# Supplementary material for: The millennium development goals and household energy requirements in Nigeria
Source: PubMed Central journal article supplement (PMC3825065; doi:10.1186/2193-1801-2-529), 2013-10-17

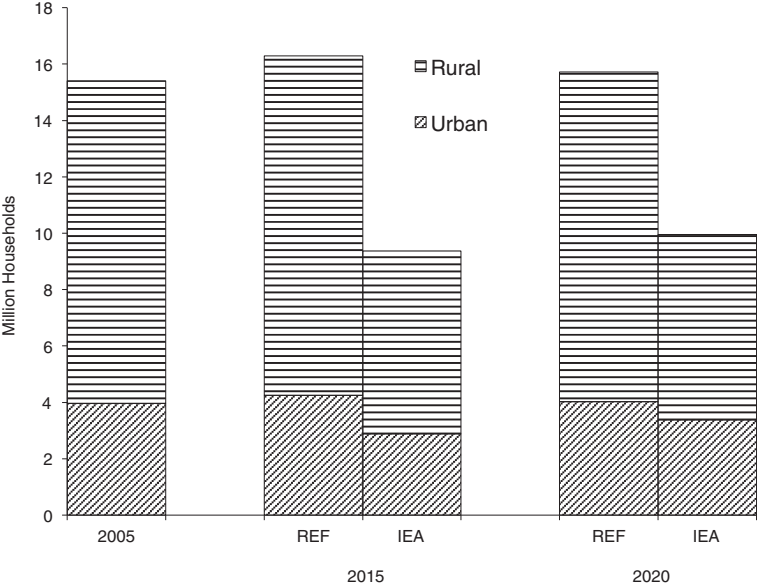

Supplement: 40064_2013_601_MOESM2_ESM.pdf [file 40064_2013_601_MOESM2_ESM.pdf]
